# Supplementary material for: Increased atmospheric vapor pressure deficit reduces global vegetation growth
Source: PubMed Central journal article supplement — Sci Adv. 2019 Aug 14;5(8):eaax1396. doi: 10.1126/sciadv.aax1396 (PMC6693914; doi:10.1126/sciadv.aax1396), 2019-08-14
Supplement: aax1396_SM.pdf [file aax1396_SM.pdf]

## Supplementary Materials for

### Increased atmospheric vapor pressure deficit reduces global vegetation growth

Wenping Yuan\*, Yi Zheng, Shilong Piao, Phillipe Ciais, Danica Lombardozzi, Yingping Wang, Youngryel Ryu, Guixing Chen, Wenjie Dong, Zhongming Hu, Atul K. Jain, Chongya Jiang, Etsushi Kato, Shihua Li, Sebastian Lienert, Shuguang Liu, Julia E.M.S. Nabel, Zhangcai Qin, Timothy Quine, Stephen Sitch, William K. Smith, Fan Wang, Chaoyang Wu, Zhiqiang Xiao, Song Yang

\*Corresponding author. Email: yuanwp3@mail.sysu.edu.cn

Published 14 August 2019, *Sci. Adv.* **5**, eaax1396 (2019)  
DOI: 10.1126/sciadv.aax1396

#### This PDF file includes:

- Fig. S1. Five-year moving average of VPD.
- Fig. S2. Spatial distributions of the difference of VPD trends ( $\text{kPa year}^{-1}$ ) before and after TP years.
- Fig. S3. Spatial pattern of VPD changes between 1982–1986 and 2011–2015 derived from CRU dataset.
- Fig. S4. Interannual variability of SVP (red dots and lines), AVP (green dots and lines), and air temperature ( $T_a$ ; blue dots and lines) derived from four datasets.
- Fig. S5. Global mean LAI and linear trends during 1982–2015.
- Fig. S6. Differences of LAI trends over the globally vegetated areas between before and after TP years.
- Fig. S7. Model validation of random forest models for simulating NDVI.
- Fig. S8. Environmental regulations on long-term changes of global NDVI.
- Fig. S9. Correlations of LUE and VPD at the different temperature ranges taking DE-Tha site as an example.
- Fig. S10. Correlations between VPD and tree-ring width.
- Fig. S11. Comparison on changes of global mean GPP trend simulated by ecosystem models.
- Fig. S12. Projected future changes in VPD.
- Fig. S13. Validation of EC-LUE model.
- Table S1. Climate and satellite datasets used in this study.
- Table S2. Responses of GPP simulated by EC-LUE, MODIS, and TRENDY models to climate variables, satellite-based NDVI and fPAR, and atmospheric  $\text{CO}_2$  concentration.
- Table S3. Name, location, and durations of the study EC sites used for revised EC-LUE model calibration and validation.
- Table S4. Correlations between VPD and LUE at different temperature ranges.
- Table S5. CMIP5 models used to estimate VPD from 1850 to 2100.

Table S6. Correlation matrixes for global VPD simulated by the six CMIP5 ESMs and four historical datasets (CRU, ERA-Interim, HadISDH, and MERRA).

Table S7. Model parameters of EC-LUE for different vegetation types.

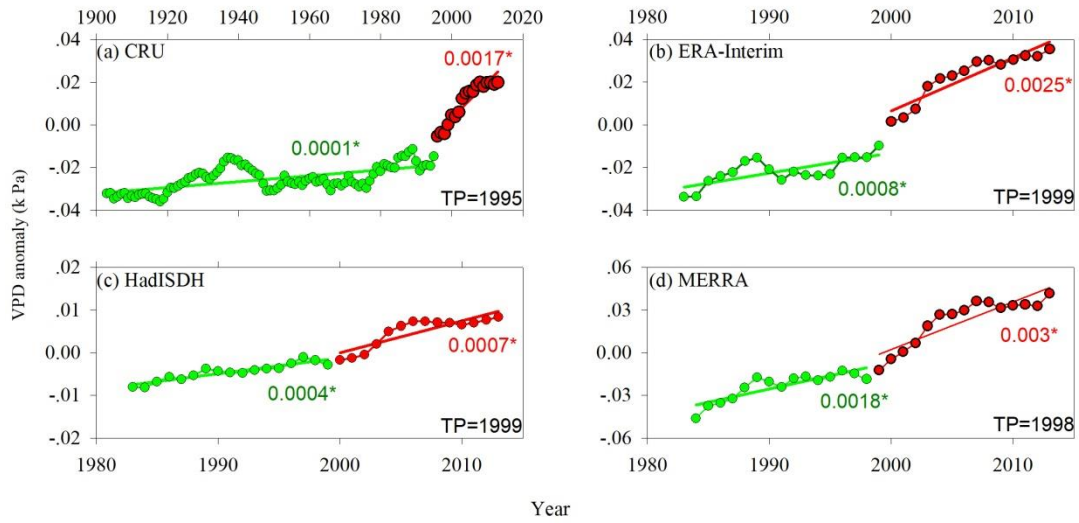

**Fig. S1. Five-year moving average of VPD.** Green and red lines indicate the linear fit before and after the turning point (TP) years. The numbers show the change rates of VPD (k Pa yr<sup>-1</sup>), and \* indicates the significant changes at a significance level of p < 0.05.

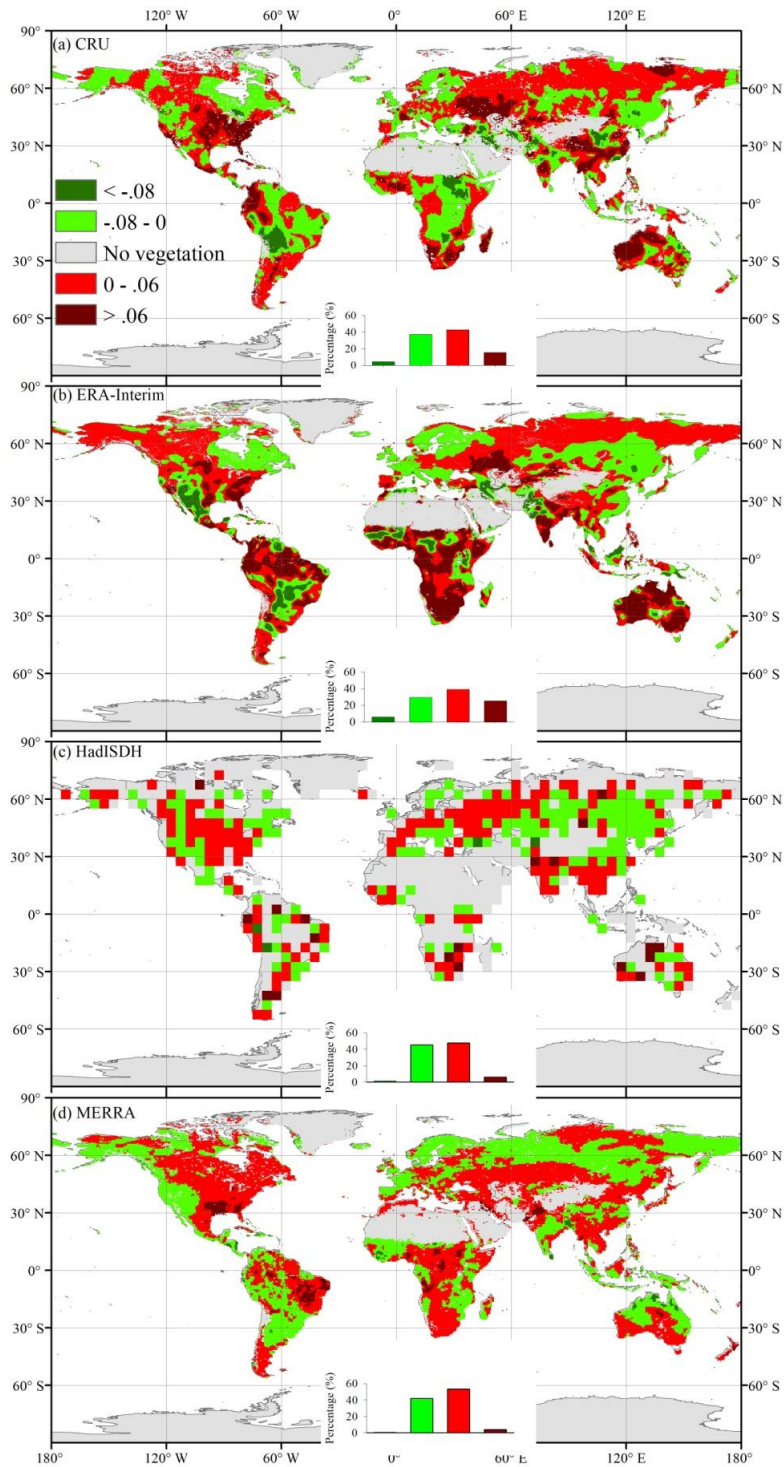

**Fig. S2. Spatial distributions of the difference of VPD trends (kPa year<sup>-1</sup>) before and after TP years. The insets show the frequency distributions of the corresponding differences. Positive values indicate the higher VPD trends after turning point years than before.**

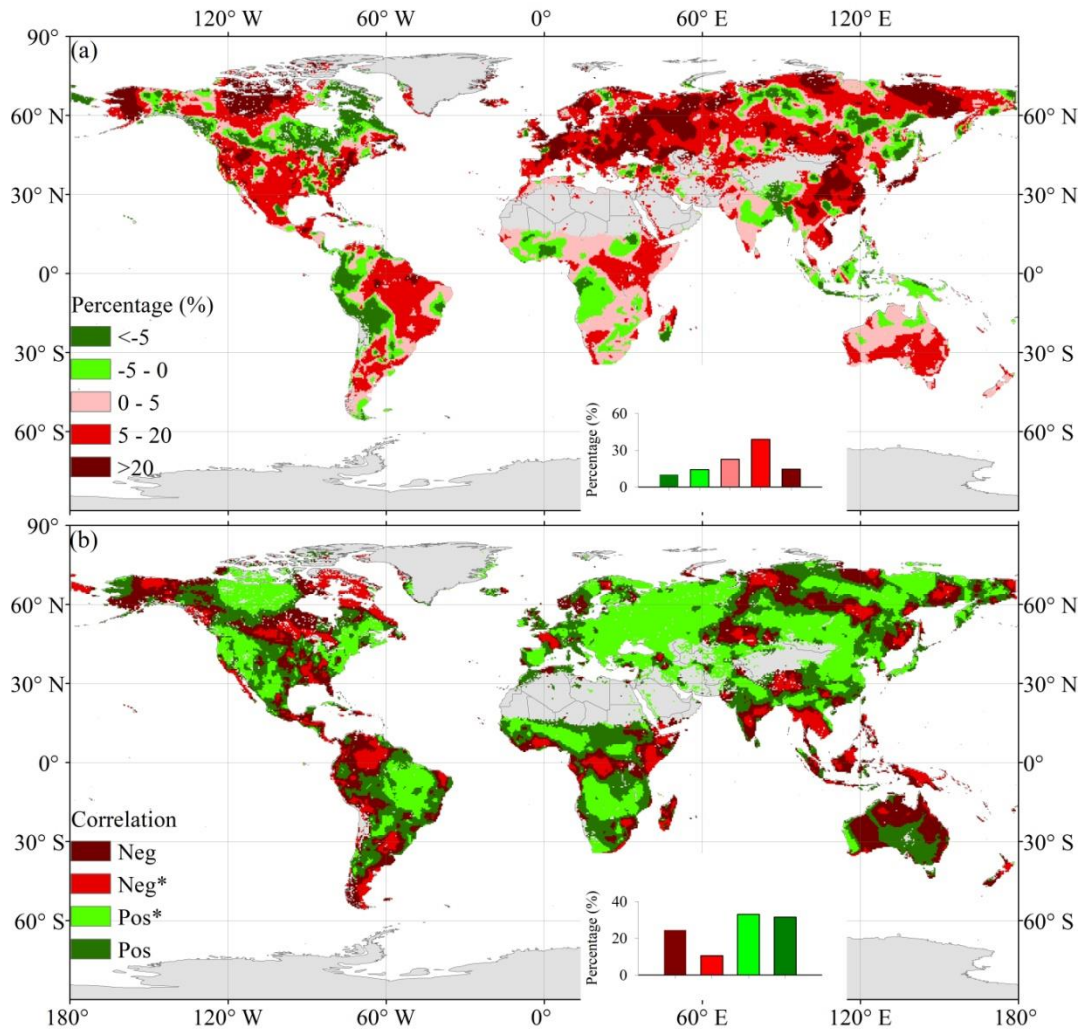

**Fig. S3. Spatial pattern of VPD changes between 1982–1986 and 2011–2015 derived from CRU dataset. (a)** Percentage changes of VPD between 1982-1986 and 2011-2015. The values show the percentage of difference:  $(VPD_2 - VPD_1) / VPD_1 \times 100\%$ .  $VPD_1$  and  $VPD_2$  are the annual growing season mean VPD values of 1982-1986 and 2011-2015. **(b)** Correlation between monthly mean VPD and VPD differences ( $VPD_2 - VPD_1$ ) over 12 months.

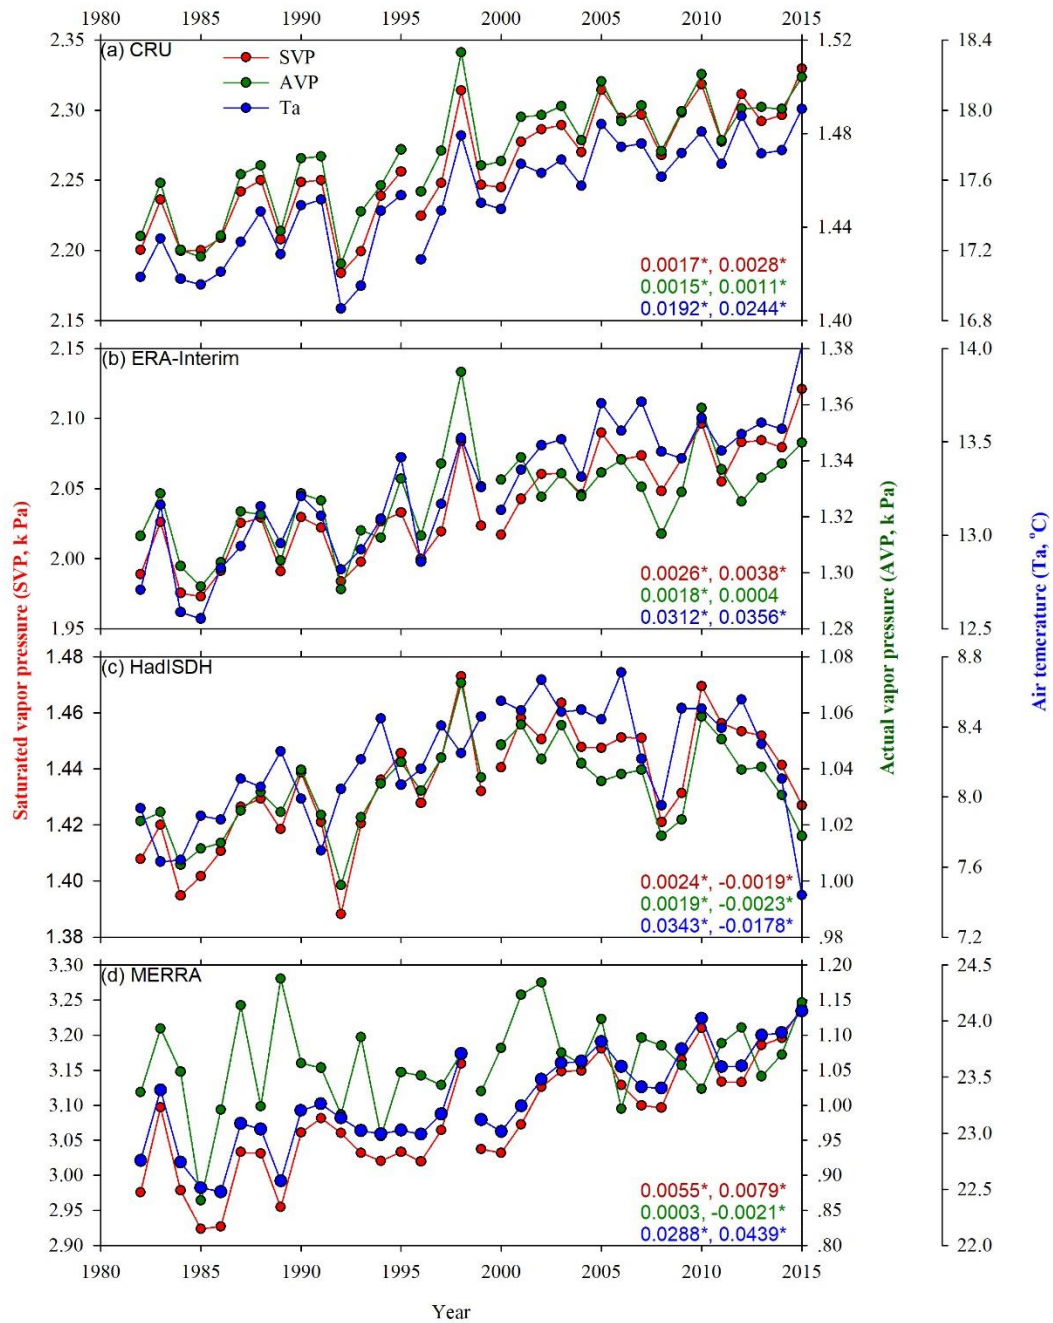

**Fig. S4. Interannual variability of SVP (red dots and lines), AVP (green dots and lines), and air temperature ( $T_a$ ; blue dots and lines) derived from four datasets. The number in the lower right corner of each plot indicate the change trends of SVP (red;  $\text{k Pa yr}^{-1}$ ), AVP (green;  $\text{k Pa yr}^{-1}$ ), and air temperature (blue;  $^{\circ}\text{C yr}^{-1}$ ) before and after the turning point years, respectively, and \* shows significant trends at  $p < 0.05$ .**



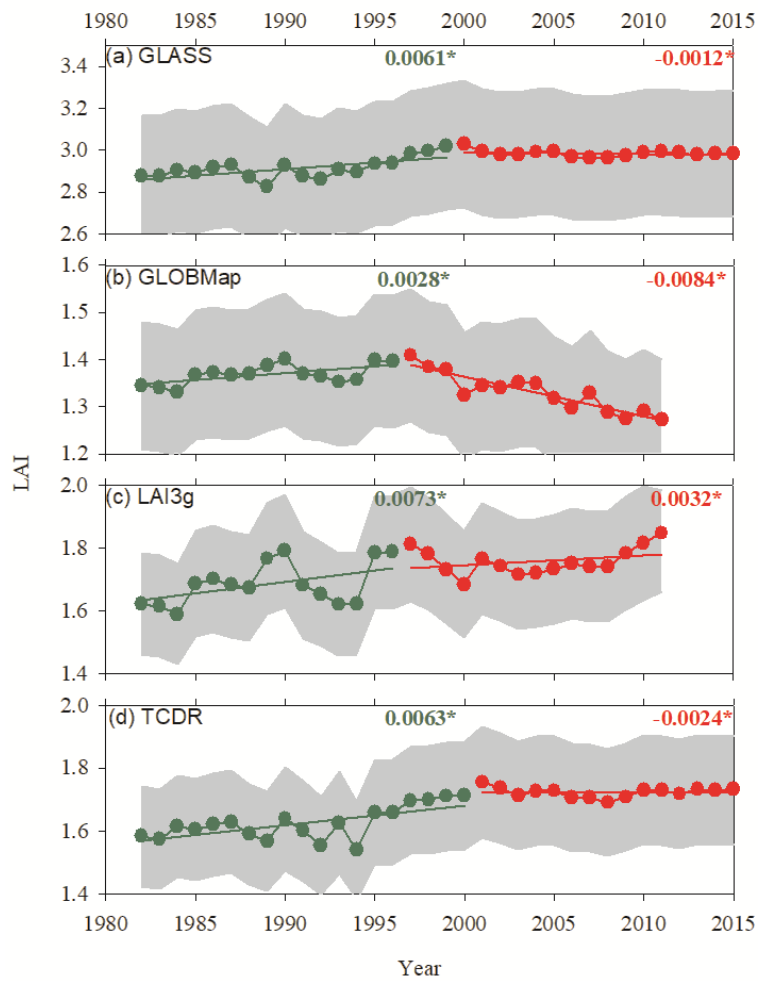

**Fig. S5. Global mean LAI and linear trends during 1982–2015.** Shaded area indicates the standard deviation. Green and red lines indicate linear fits before and after the turning point years. The numbers show the change rates of LAI, and \* indicates the significant changes at a significance level of  $p < 0.05$ .

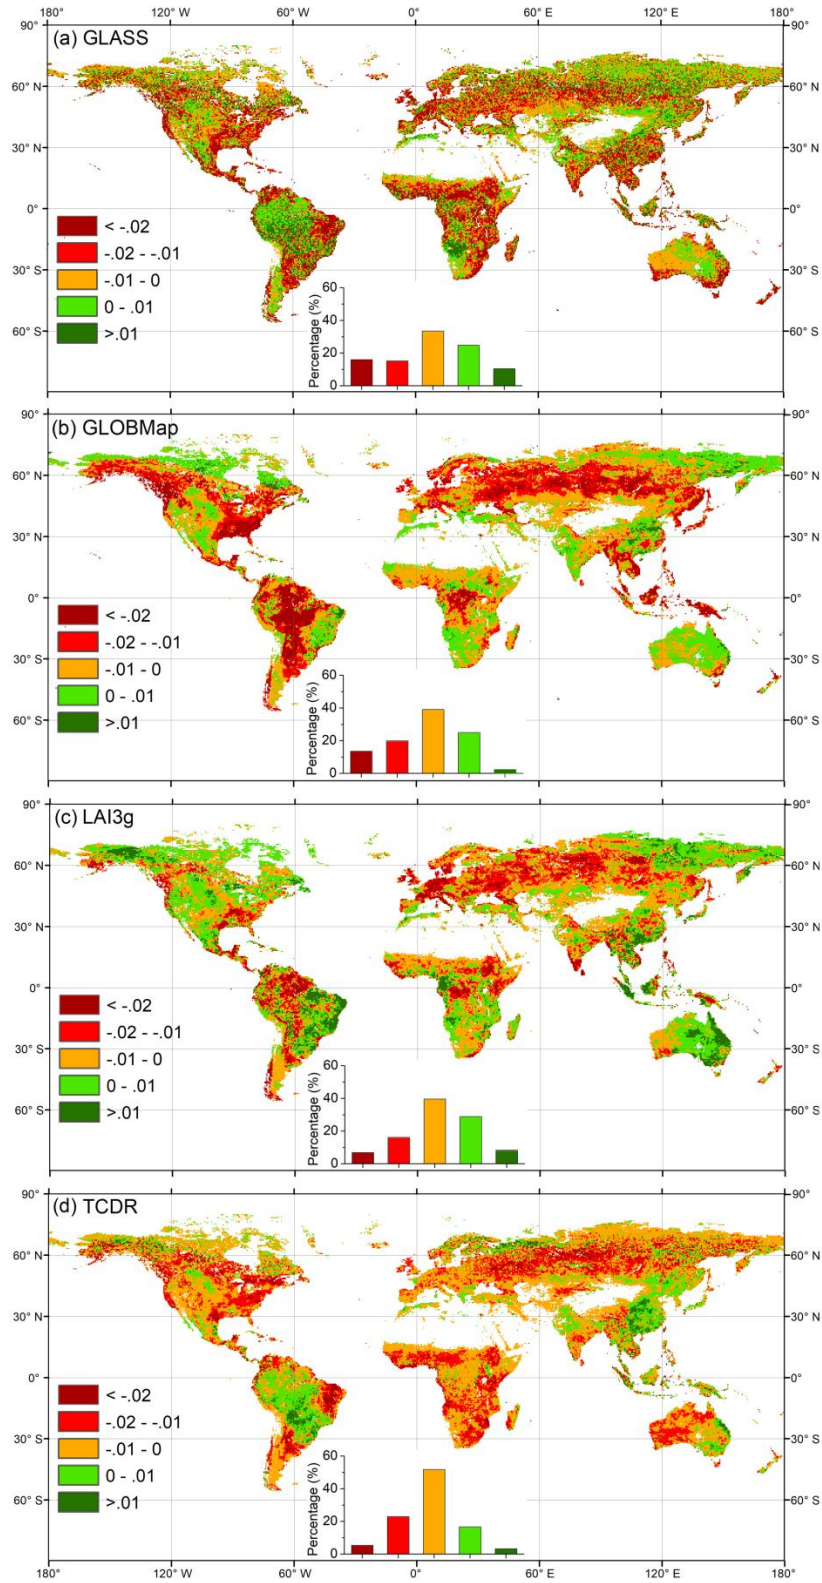

**Fig. S6. Differences of LAI trends over the globally vegetated areas between before and after TP years. Insets show the frequency distributions of the corresponding differences. Negative values indicate the lower LAI trends after turning point years than before.**



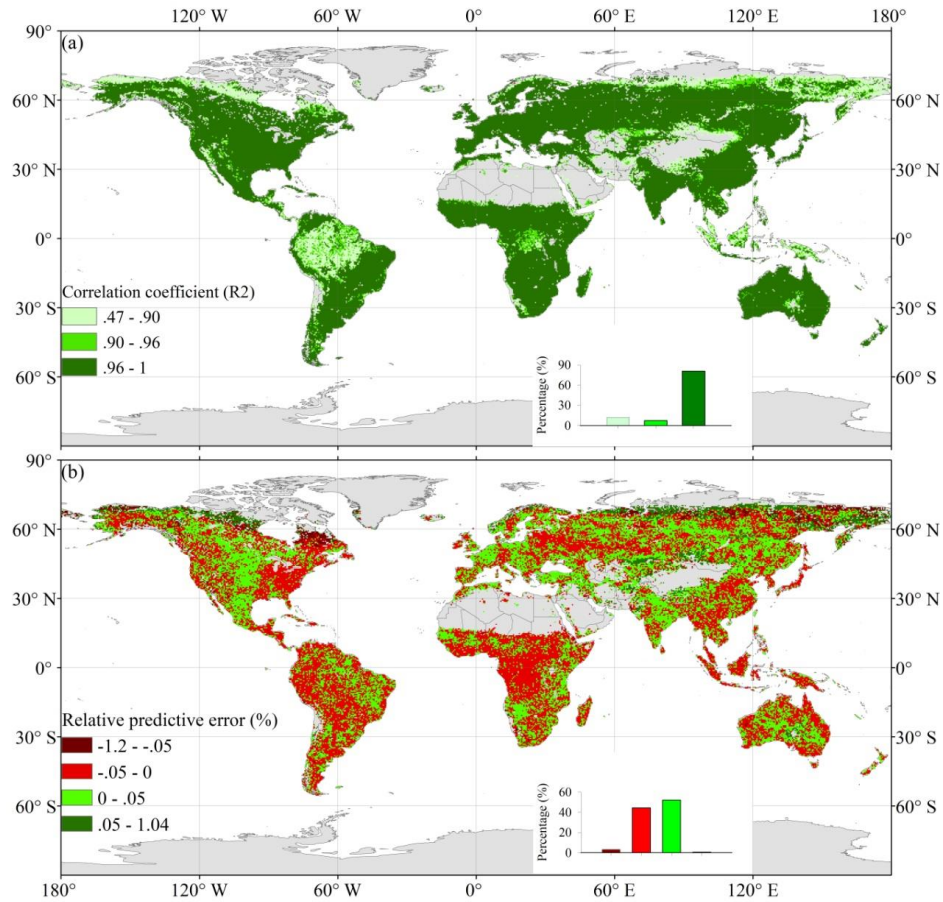

**Fig. S7. Model validation of random forest models for simulating NDVI. (a)** Interannual correlation coefficient ( $R^2$ ) and **(b)** relative predictive error (RPE, %) ( $PRE = (S-O)/O$ , S and O indicate the simulated NDVI and GIMMS3g NDVI values, respectively.)

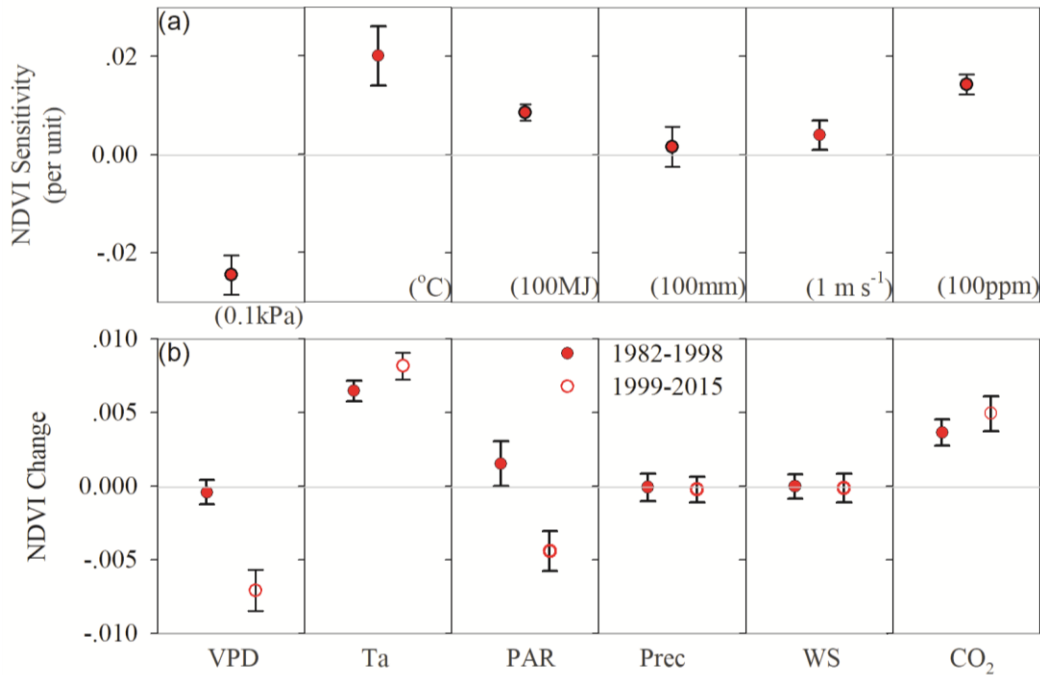

**Fig. S8. Environmental regulations on long-term changes of global NDVI.** (a) NDVI sensitivity to climate variables and atmospheric CO<sub>2</sub> concentration. (b) Contributions of climate variables and atmospheric CO<sub>2</sub> concentration (CO<sub>2</sub>) to NDVI changes over the two periods. Five climate variables are included: vapor pressure deficit (VPD), air temperature (Ta), photosynthetically active radiation (PAR), precipitation (Prec), and wind speed (WS). The positive values indicate NDVI increases with these variables.

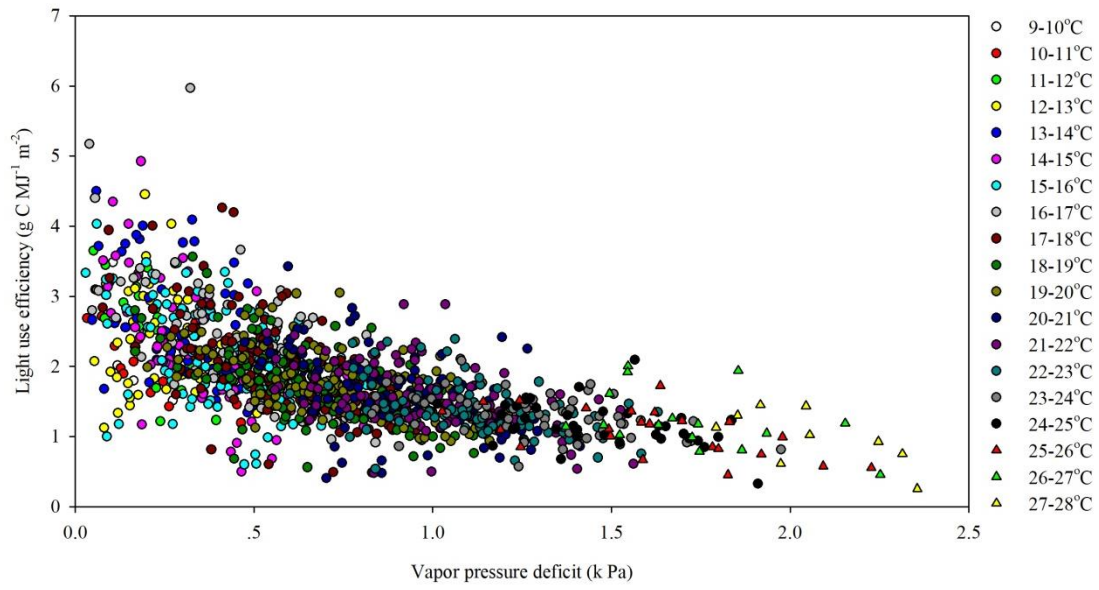

**Fig. S9. Correlations of LUE and VPD at the different temperature ranges taking DE-Tha site as an example.**

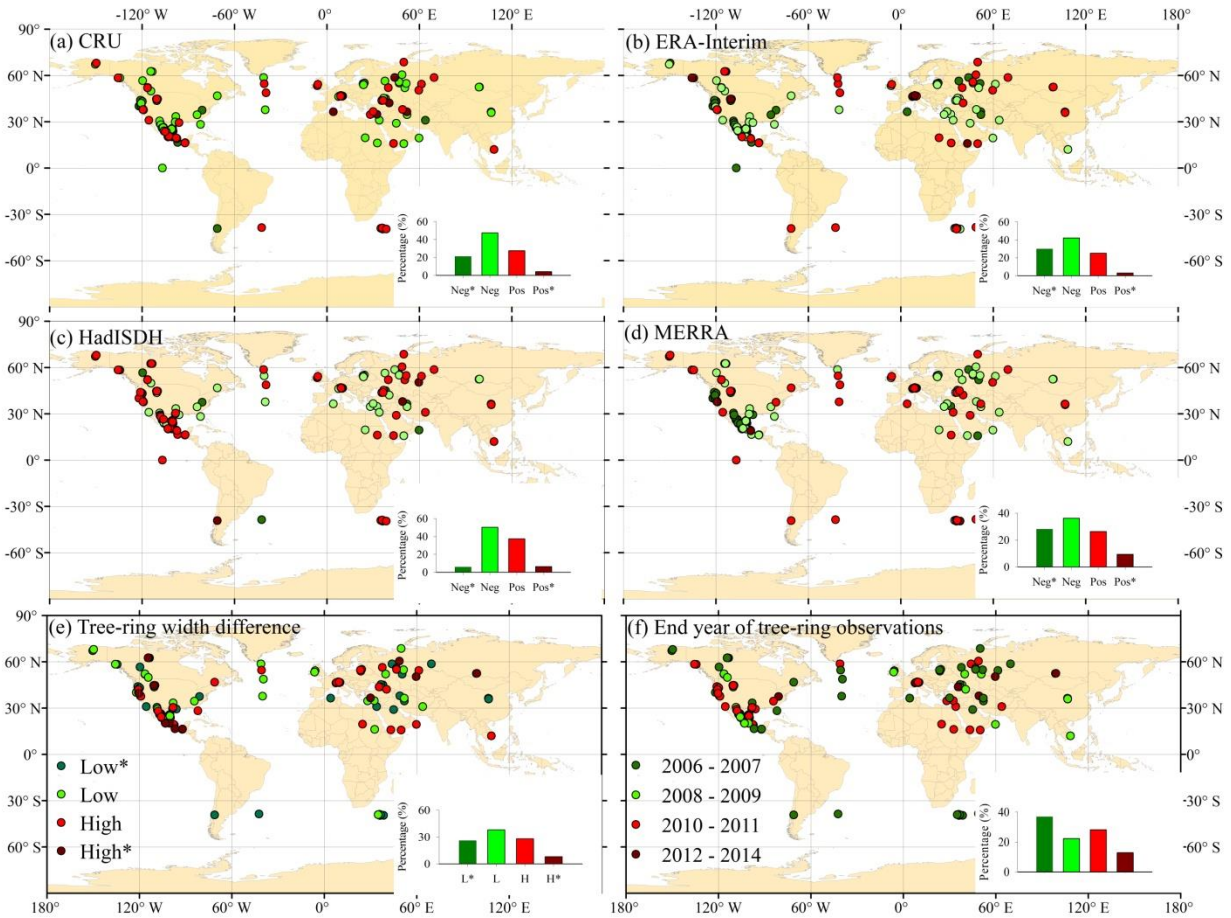

**Fig. S10. Correlations between VPD and tree-ring width.** (a)-(d) Partial correlations between detrended tree-ring width and detrended vapor pressure deficit derived from four datasets excluding the impacts of air temperature, radiation and atmospheric CO<sub>2</sub> concentration. Inserts indicate the percentage of four types of correlation (Neg and Pos indicate negative and positive correlations, respectively, and \* indicate a significant correlation at the  $p < 0.05$  level). (e) Comparison on mean tree-ring width between two periods (1982-1998 and after 1999). Low and High indicate the lower and higher mean values of tree-ring width after 1999 compared to those of 1982-1998 respectively. \* indicates the significant differences between two periods using the t-test ( $p < 0.05$ ). Inserts indicate the percentage of four types of differences. (f) The end year of tree-ring width observations, and the insert shows the percentage of four time ranges.

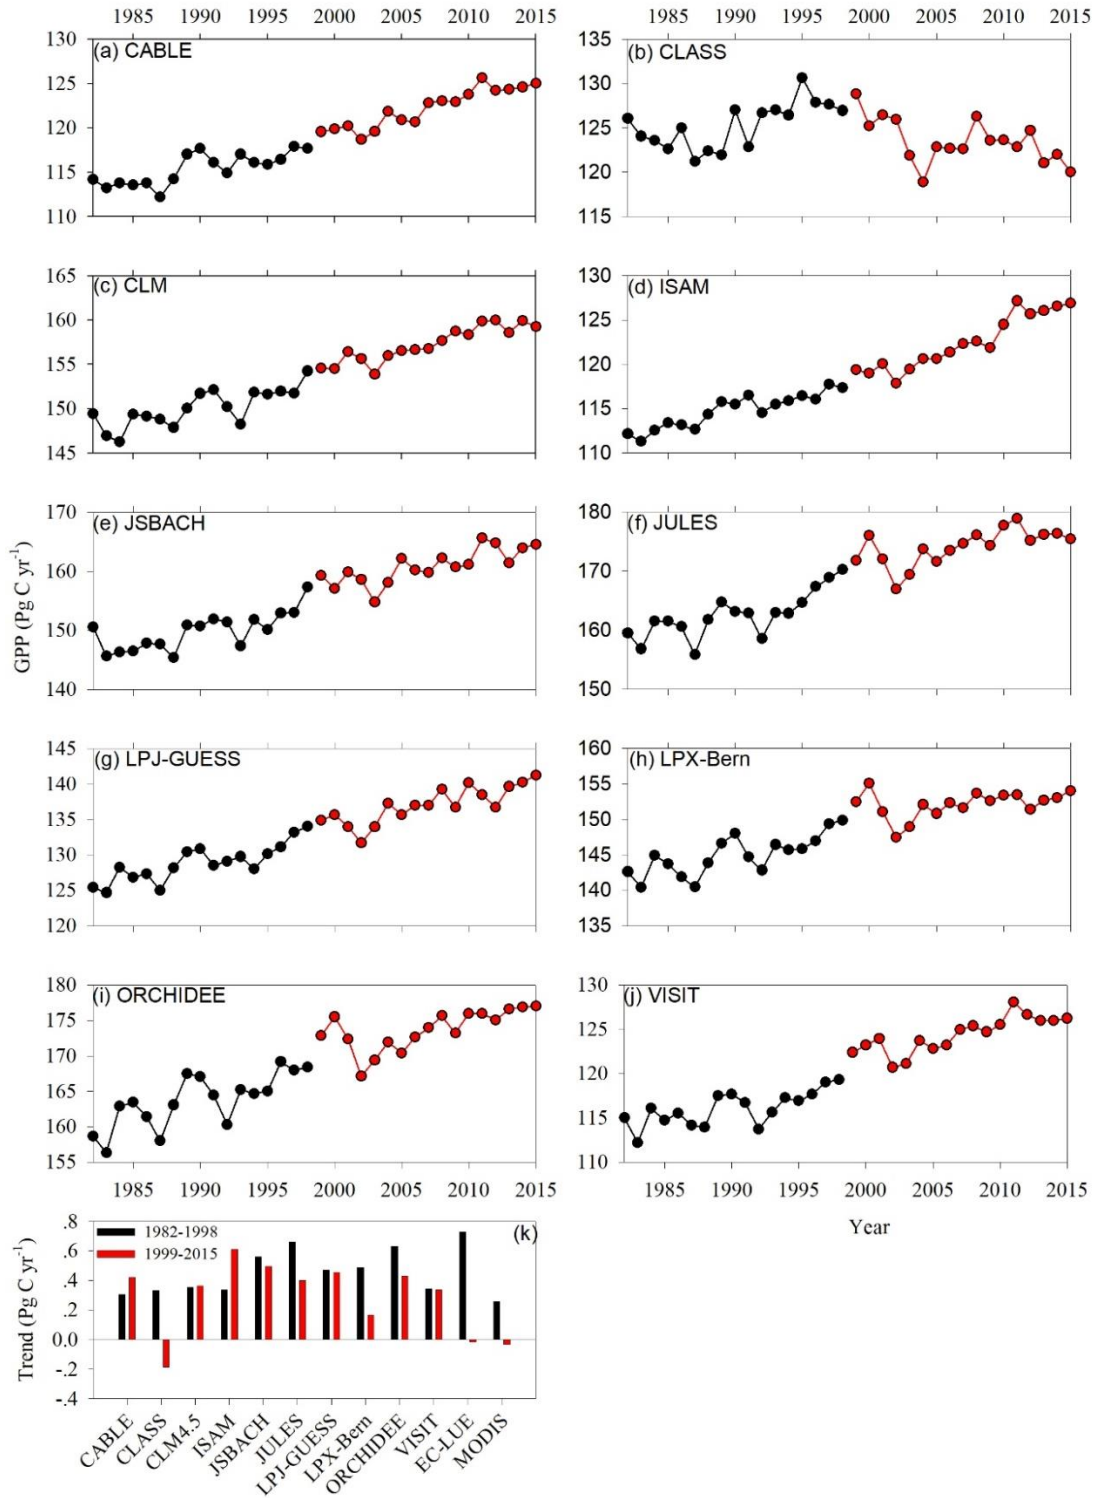

**Fig. S11. Comparison on changes of global mean GPP trend simulated by ecosystem models. (a-j) Time series of GPP; (k) Changes of GPP trend for ecosystem models and two satellite-based models over the two periods of 1982-1998 and 1999-2015.**

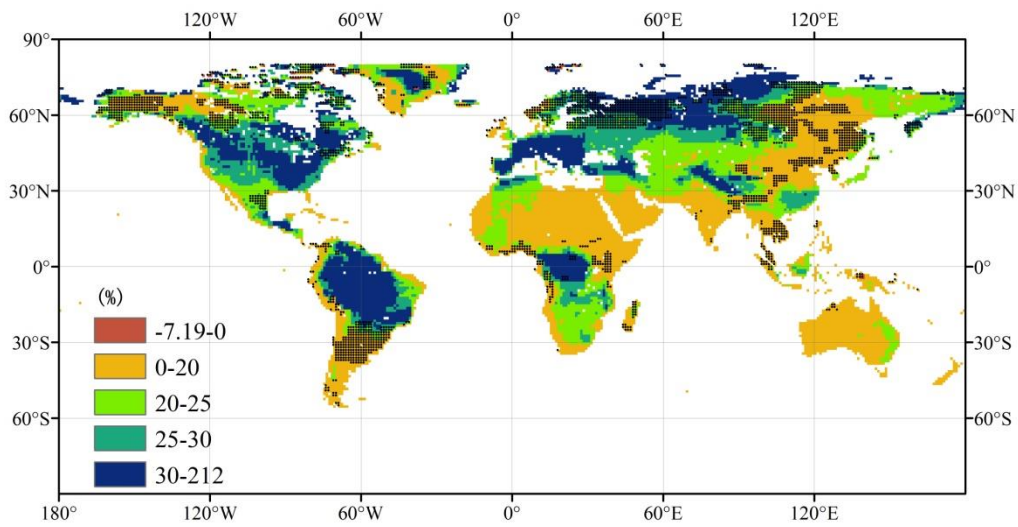

**Fig. S12. Projected future changes in VPD.** Percentage differences between 2080-2099 and 1980-1999 in the multimodel mean VPD simulated by six CMIP5 models under the RCP4.5 emissions scenario. Stippling indicates the areas where at least one model does not agree on the sign of the change.



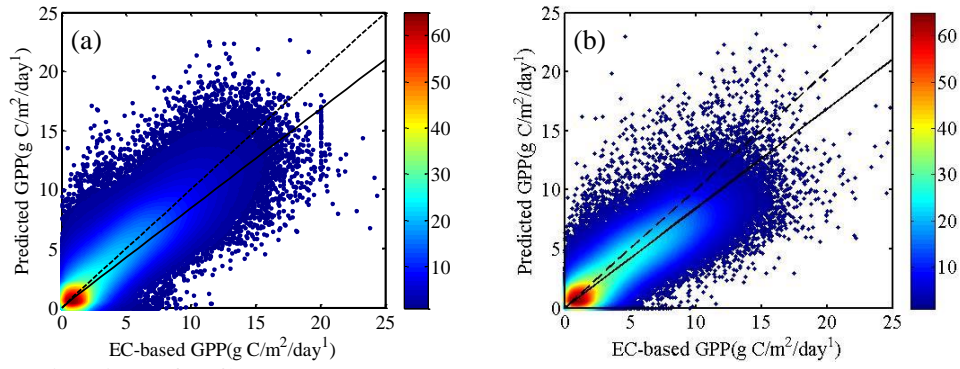

**Fig. S13. Validation of EC-LUE model.** Estimated GPP based on eddy covariance measurements vs. predicted GPP by EC-LUE at (a) model calibration sites and (b) validation sites in Table S4. Dashed lines are the 1:1 line and solid lines are the linear regression line. The regression relations in (a) and (b) are  $y = 0.84x + 0.31$ ,  $R^2=0.72$ ,  $p<0.05$ ;  $y = 0.73x + 0.55$ ,  $R^2=0.68$ ,  $p<0.05$ , respectively.

**Table S1. Climate and satellite datasets used in this study.**

| Variables          | Dataset name | Coverage, resolution                                                | Time span   | Reference and source                                                                                                                |
|--------------------|--------------|---------------------------------------------------------------------|-------------|-------------------------------------------------------------------------------------------------------------------------------------|
| Ta, AVP            | CRUts3.25    | Global, 0.5°×0.5°; monthly                                          | 1901 – 2015 | Harris et al., 2014 (31)<br><a href="http://www.cru.uea.ac.uk/data">http://www.cru.uea.ac.uk/data</a>                               |
| Ta, Td             | ERA-Interim  | Global, 0.125°×0.125°; monthly                                      | 1982 – 2015 | Dee et al., 2011 (33)<br><a href="http://apps.ecmwf.int/datasets/">http://apps.ecmwf.int/datasets/</a>                              |
| Ta, RH             | HadISDH      | Global, 5°×5°; monthly                                              | 1982 – 2015 | Willet et al., 2012 (32)<br><a href="https://www.metoffice.gov.uk/hadobs/hadisdh/">https://www.metoffice.gov.uk/hadobs/hadisdh/</a> |
| Ta, RH             | MERRA        | Global, 0.5°×0.6°; monthly                                          | 1982 – 2015 | Reichle, 2012 (34)<br><a href="https://disc.gsfc.nasa.gov/datasets">https://disc.gsfc.nasa.gov/datasets</a>                         |
| E <sub>ocean</sub> | OAFflux      | Global, 1°×1°; monthly                                              | 1958 – 2015 | Yu et al., 2007 (20)<br><a href="http://oaflux.whoi.edu/">http://oaflux.whoi.edu/</a>                                               |
| NDVI               | GIMMS-3g     | Global, 8km×8km; biweekly                                           | 1982 – 2015 | Pinzon & Tucker, 2014 (36)<br><a href="https://ecocast.arc.nasa.gov/data/pub/gimms">https://ecocast.arc.nasa.gov/data/pub/gimms</a> |
| LAI                | GLASS        | Global, 0.05°×0.05°; 8-day                                          | 1982 – 2015 | Xiao et al., 2016 (37)<br><a href="ftp://ftp.glcf.umd.edu/">ftp://ftp.glcf.umd.edu/</a>                                             |
|                    | GLOAMap      | Global, 1/13.75°×1/13.75°;<br>Biweekly, 1982–1999; 8-day, 2000–2011 | 1982 – 2011 | Liu et al., 2012 (38)<br><a href="http://www.globalmapping.org/">http://www.globalmapping.org/</a>                                  |
|                    | LAI3g        | Global, 1/12°×1/12°; Biweekly                                       | 1982 – 2011 | Zhu et al., 2013 (39)<br><a href="http://sites.bu.edu/cliveg/datacodes/">http://sites.bu.edu/cliveg/datacodes/</a>                  |
|                    | TCDR         | Global, 0.05°×0.05°; Daily                                          | 1982 – 2015 | Claverie et al., 2016 (40)<br><a href="ftp://eclipse.ncdc.noaa.gov/">ftp://eclipse.ncdc.noaa.gov/</a>                               |
| fPAR               | GIMMS-3g     | Global, 1/12°×1/12°; Biweekly                                       | 1982 – 2011 | Zhu et al., 2013 (39)<br><a href="http://sites.bu.edu/cliveg/datacodes/">http://sites.bu.edu/cliveg/datacodes/</a>                  |

Ta, Td, AVP, RH, E<sub>ocean</sub> are land surface air temperature, dewpoint temperature, vapor pressure, relative humidity, and oceanic evaporation, respectively. NDVI and LAI are Normalized Difference Vegetation Index and Leaf Area Index. fPAR is fraction of photosynthetically active radiation absorbed by the vegetation canopy.

**Table S2. Responses of GPP simulated by EC-LUE, MODIS, and TRENDY models to climate variables, satellite-based NDVI and fPAR, and atmospheric CO<sub>2</sub> concentration.**

|                    | GPP sensitivity <sup>1</sup> |                            |                           | Changes and impacts on GPP of 1982-1998 |                        |                        |                        | Changes and impacts on GPP of 1999-2015 |                        |                        |                        |
|--------------------|------------------------------|----------------------------|---------------------------|-----------------------------------------|------------------------|------------------------|------------------------|-----------------------------------------|------------------------|------------------------|------------------------|
|                    | EC-LUE                       | MODIS                      | TREDNY                    | Rate <sup>2</sup>                       | EC-LUE                 | MODIS                  | TREDNY                 | Rate                                    | EC-LUE                 | MODIS                  | TREDNY                 |
| VPD                | -13.82±3.12<br>Pg C/0.1kPa   | -18.29±3.65<br>Pg C/0.1kPa | -4.57±7.04<br>Pg C/0.1kPa | 0.0001±0.001<br>kPa/yr                  | -0.013±0.10<br>Pg C/yr | -0.018±0.15<br>Pg C/yr | -0.004±0.15<br>Pg C/yr | 0.0017±0.0001<br>kPa/yr                 | -0.234±0.09<br>Pg C/yr | -0.310±0.11<br>Pg C/yr | -0.077±0.09<br>Pg C/yr |
| Ta                 | 5.91±1.18<br>Pg C/°C         | 0.81±3.01<br>Pg C/°C       | 6.02±6.04<br>Pg C/°C      | 0.019±0.11<br>°C/yr                     | 0.112±0.12<br>Pg C/yr  | 0.015±0.09<br>Pg C/yr  | 0.114±0.18<br>Pg C/yr  | 0.024±0.06<br>°C/yr                     | 0.141±0.13<br>Pg C/yr  | 0.019±0.15<br>Pg C/yr  | 0.144±0.12<br>Pg C/yr  |
| PAR                | 4.81±1.60<br>Pg C/100MJ      | 3.62±1.18<br>Pg C/100MJ    | 3.65±2.85<br>Pg C/100MJ   | 1.04±0.47<br>MJ/yr                      | 0.050±0.04<br>Pg C/yr  | 0.037±0.05<br>Pg C/yr  | 0.037±0.09<br>Pg C/yr  | -3.02±0.48<br>MJ/yr                     | -0.145±0.08<br>Pg C/yr | -0.109±0.09<br>Pg C/yr | -0.110±0.09<br>Pg C/yr |
| NDVI               | 22.82±5.03<br>Pg C/0.1NDVI   | -                          | -                         | 0.0014±0.0001                           | 0.319±0.09<br>Pg C/yr  | -                      | -                      | -0.0004±0.0003                          | -0.091±0.08<br>Pg C/yr | -                      | -                      |
| fPAR               | -                            | 15.03±3.11<br>Pg C/0.1fPAR | -                         | 0.001±0.0003                            | -                      | 0.150±0.08<br>Pg C/yr  | -                      | 0.0007±0.0002                           | -                      | 0.075±0.11<br>Pg C/yr  | -                      |
| [CO <sub>2</sub> ] | 19.01±4.01<br>Pg C/100ppm    | -                          | 21.92±4.55<br>Pg C/100ppm | 1.49±0.03<br>ppm/yr                     | 0.283±0.15<br>Pg C/yr  | -                      | 0.326±0.16<br>Pg C/yr  | 2.02±0.01<br>ppm/yr                     | 0.383±0.08<br>Pg C/yr  | -                      | 0.442±0.12<br>Pg C/yr  |

<sup>1</sup>Estimated GPP sensitivities to climate variables (VPD, Ta, and PAR), satellite-based vegetation index (NDVI and fPAR), and atmospheric CO<sub>2</sub> concentration ([CO<sub>2</sub>]) by Eq. (20-22). <sup>2</sup>Change rates of six variables during the investigated periods. VPD and Ta are derived from CRU dataset, and PAR is derived from MERRA dataset.

**Table S3. Name, location, and durations of the study EC sites used for revised EC-LUE model calibration and validation.**

| Site                     | Latitude | Longitude | Type | Study Period         |
|--------------------------|----------|-----------|------|----------------------|
| <i>Model calibration</i> |          |           |      |                      |
| BE-Lon                   | 50.55°N  | 4.74°E    | CRO  | 2004-2011            |
| DE-Kli                   | 50.89°N  | 13.52°E   | CRO  | 2004-2011            |
| FI-Gri                   | 48.84°N  | 1.95°E    | CRO  | 2004-2011            |
| US-Ne1                   | 41.16°N  | 96.47°W   | CRO  | 2001-2011            |
| DE-Hai                   | 51.08°N  | 10.45°E   | DBF  | 2000-2011            |
| IT-PT1                   | 45.20°N  | 9.06°E    | DBF  | 2002-2004            |
| IT-Ro2                   | 42.39°N  | 11.92°E   | DBF  | 2002-2011            |
| JP-MBF                   | 44.39°N  | 142.32°E  | DBF  | 2004-2005            |
| US-Ha1                   | 42.54°N  | 72.17°W   | DBF  | 1991-2011            |
| US-Oho                   | 41.55°N  | 83.84°W   | DBF  | 2004-2011            |
| US-WCr                   | 45.81°N  | 90.08°W   | DBF  | 1999-2006            |
| BR-Sa3                   | 3.02°S   | 54.97°W   | EBF  | 2000-2003            |
| FR-Pue                   | 43.74°N  | 3.60°E    | EBF  | 2000-2011            |
| MY-PSO                   | 2.97°N   | 102.31°E  | EBF  | 2003-2009            |
| CA-NS2                   | 55.91°N  | 98.52°W   | ENF  | 2001-2005            |
| CA-NS3                   | 55.91°N  | 98.38°W   | ENF  | 2001-2005            |
| CA-SF1                   | 54.49°N  | 105.82°W  | ENF  | 2003-2006            |
| CA-SF2                   | 54.25°N  | 105.88°W  | ENF  | 2001-2005            |
| CA-TP1                   | 42.66°N  | 80.56°W   | ENF  | 2003-2011            |
| CA-TP2                   | 42.77°N  | 80.46°W   | ENF  | 2003-2007            |
| CZ-BK1                   | 49.50°N  | 18.54°E   | ENF  | 2004-2011            |
| DE-Lkb                   | 49.10°N  | 13.30°E   | ENF  | 2009-2011            |
| DE-Tha                   | 50.96°N  | 13.57°E   | ENF  | 1997-2011            |
| US-Blo                   | 38.90°N  | 120.63°W  | ENF  | 1997-2007            |
| US-Me2                   | 44.45°N  | 121.56°W  | ENF  | 2002-2011            |
| US-Me6                   | 44.32°N  | 121.61°W  | ENF  | 2010-2011            |
| US-NR1                   | 40.03°N  | 105.55°W  | ENF  | 1999-2011            |
| CH-Cha                   | 47.21°N  | 8.41°E    | GRA  | 2006-2008; 2010-2011 |
| CH-Oe1                   | 47.29°N  | 7.73°E    | GRA  | 2002-2008            |
| CN-Cng                   | 44.59°N  | 123.51°E  | GRA  | 2007-2010            |
| CN-HaM                   | 37.37°N  | 101.18°E  | GRA  | 2002-2004            |
| CZ-BK2                   | 49.49°N  | 18.54°E   | GRA  | 2006-2011            |
| DE-Gri                   | 50.95°N  | 13.51°E   | GRA  | 2004-2011            |
| RU-Ha1                   | 54.73°N  | 90.00°E   | GRA  | 2002-2004            |
| US-Goo                   | 34.25°N  | 89.87°W   | GRA  | 2002-2006            |
| US-Var                   | 38.41°N  | 120.95°W  | GRA  | 2002-2011            |
| AR-SLu                   | 33.46°S  | 66.46°W   | MF   | 2010                 |
| CN-Cha                   | 42.40°N  | 128.10°E  | MF   | 2003-2005            |
| US-PFa                   | 45.95°N  | 90.27°W   | MF   | 1996-2011            |
| US-Syv                   | 46.24°N  | 89.35°W   | MF   | 2001-2006            |
| CA-NS7                   | 56.64°N  | 99.95°W   | SHR  | 2003-2005            |
| US-KS2                   | 28.61°N  | 80.67°W   | SHR  | 2003-2006            |

|                         |         |          |     |                      |
|-------------------------|---------|----------|-----|----------------------|
| CA-SF3                  | 54.09°N | 106.01°W | SHR | 2002-2006            |
| US-Sta                  | 41.40°N | 106.80°W | SHR | 2008-2009            |
| AU-DaS                  | 14.16°S | 131.39°E | SAV | 2008-2011            |
| AU-Ade                  | 13.08°S | 131.12°E | SAV | 2008-2009            |
| CN-Ha2                  | 37.61°N | 101.33°E | WET | 2003-2005            |
| DE-Spw                  | 51.89°N | 14.03°E  | WET | 2010-2011            |
| US-Ivo                  | 68.49°N | 155.75°W | WET | 2004-2007            |
| US-Los                  | 46.08°N | 89.98°W  | WET | 2000-2010            |
| <i>Model validation</i> |         |          |     |                      |
| US-Ne2                  | 41.16°N | 96.47°W  | CRO | 2001-2011            |
| US-Ne3                  | 41.17°N | 96.43°W  | CRO | 2001-2011            |
| US-Twt                  | 38.10°N | 121.65°W | CRO | 2009-2011            |
| US-ARM                  | 36.60°N | 97.48°W  | CRO | 2003-2011            |
| FR-Fon                  | 48.48°N | 2.78°E   | DBF | 2005-2011            |
| IT-Ro1                  | 42.41°N | 11.93°E  | DBF | 2000-2008            |
| US-MMS                  | 39.32°N | 86.41°W  | DBF | 1999-2011            |
| US-UMB                  | 45.56°N | 84.71°W  | DBF | 2000-2011            |
| ZM-Mon                  | 15.44°S | 23.25°E  | DBF | 2007-2009            |
| AU-Tum                  | 35.66°S | 148.15°E | EBF | 2001-2011            |
| BR-Sa1                  | 2.86°S  | 54.96°W  | EBF | 2008-2011            |
| CN-Din                  | 23.17°N | 112.54°E | EBF | 2003-2005            |
| AU-ASM                  | 22.28°S | 133.25°E | ENF | 2010-2011            |
| CA-NS1                  | 55.88°N | 98.48°W  | ENF | 2002-2005            |
| CA-NS4                  | 55.91°N | 98.38°W  | ENF | 2003-2005            |
| CA-NS5                  | 55.86°N | 98.49°W  | ENF | 2001-2005            |
| CA-Qfo                  | 49.69°N | 74.34°W  | ENF | 2003-2010            |
| CA-TP3                  | 42.71°N | 80.35°W  | ENF | 2003-2011            |
| CN-Qia                  | 26.74°N | 115.06°E | ENF | 2003-2005            |
| DE-Obe                  | 50.78°N | 13.72°E  | ENF | 2008-2011            |
| FI-Hyy                  | 61.85°N | 24.30°E  | ENF | 1996-2011            |
| IT-La2                  | 45.95°N | 11.29°E  | ENF | 2001                 |
| IT-Lav                  | 45.96°N | 11.28°E  | ENF | 2003-2011            |
| IT-Ren                  | 46.59°N | 11.43°E  | ENF | 1999-2004, 2009-2011 |
| NL-Loo                  | 52.17°N | 5.74°E   | ENF | 1996-2011            |
| RU-Fyo                  | 56.46°N | 32.92°E  | ENF | 1998-2011            |
| AT-Neu                  | 47.12°N | 11.32°E  | GRA | 2002-2003; 2009-2011 |
| AU-DaP                  | 14.06°S | 131.32°E | GRA | 2008, 2010-2011      |
| CH-Fru                  | 47.12°N | 8.54°E   | GRA | 2006-2008; 2010-2011 |
| CN-Du2                  | 42.05°N | 116.28°E | GRA | 2007-2008            |
| IT-Tor                  | 45.84°N | 7.58°E   | GRA | 2009-2011            |
| NL-Hor                  | 52.24°N | 5.07°E   | GRA | 2004-2011            |
| US-AR1                  | 36.43°N | 99.42°W  | GRA | 2009-2011            |
| US-AR2                  | 36.64°N | 99.60°W  | GRA | 2009-2011            |
| BE-Bra                  | 51.31°N | 4.52°E   | MF  | 1999-2011            |
| BE-Vie                  | 50.31°N | 6.00°E   | MF  | 1999-2011            |

|        |         |          |     |           |
|--------|---------|----------|-----|-----------|
| CA-Gro | 48.22°N | 82.16°W  | MF  | 2003-2011 |
| CA-NS6 | 55.92°N | 98.96°W  | SHR | 2002-2005 |
| ES-LgS | 37.10°N | 2.97°W   | SHR | 2007-2009 |
| AU-Dry | 15.26°S | 132.37°E | SAV | 2008-2011 |
| US-Ton | 38.43°N | 120.97°W | SAV | 2001-2011 |

CRO: cropland; DBF: deciduous broadleaf forest; EBF: evergreen broadleaf forest; ENF: evergreen needleleaf forest; GRA: grassland; MF: mixed forest; WET: wetland; SAV: savanna; SHR: shrubland.



**Table S4. Correlations between VPD and LUE at different temperature ranges.**

| Site   | 15-16°C <sup>1</sup>    | 16-17°C      | 17-18°C      | 18-19°C      | 19-20°C       | 20-21°C      | 21-22°C      | 22-23°C      | 23-24°C      | 24-25°C     |
|--------|-------------------------|--------------|--------------|--------------|---------------|--------------|--------------|--------------|--------------|-------------|
| AR-SLu | 0.27, 1.15 <sup>2</sup> | 0.51, 1.40   | -            | 6.10, 5.16   | -2.85, 14.51  | -0.54, 6.95* | -1.67, 6.84  | -1.08, 5.14  | -0.65, 4.23* | -           |
| AT-Neu | -1.00, 4.26*            | -1.11, 4.46* | -1.19, 4.80* | -0.78, 4.03* | -1.25, 5.03*  | -0.49, 3.33* | -0.78, 0.37* | -0.18, 2.35  | -1.45, 5.61  | -           |
| AU-Ade | -                       | -            | -            | -            | -0.67, 2.34*  | -            | -            | -            | -            | -           |
| AU-ASM | -                       | -            | -            | -            | -10.76, 32.52 | -            | -6.53, 10.62 | -0.81, 2.47  | -0.28, 1.92  | -           |
| AU-Dap | -                       | -            | -            | -            | -             | -            | -            | -            | -0.77, 2.99* | -0.57, 2.78 |
| AU-DaS | -                       | -            | -            | -            | -             | -0.57, 2.12* | -            | -            | -            | -           |
| AU-Tum | -0.58, 2.39*            | -0.41, 2.13* | -0.12, 1.57  | -0.43, 2.23* | -0.13, 1.54   | -0.27, 1.93  | -0.42, 2.25  | -0.78, 3.29* | -0.95, 3.82  | -           |
| BE-Bra | -0.25, 1.91*            | -0.36, 2.02* | -0.21, 1.82* | -0.33, 2.07* | -0.23, 1.73*  | -0.46, 2.25* | -0.45, 2.18* | -0.60, 2.58* | -0.45, 2.21* | -           |
| BE-Lon | 0.03, 1.22              | -0.35, 1.75* | -0.28, 1.85  | -0.65, 2.37* | -0.18, 1.84   | -0.55, 2.22  | -0.44, 2.22  | -0.11, 1.32  | -1.36, 4.31* | -           |
| BE-Vie | -0.40, 2.03*            | -0.53, 2.27* | -0.47, 2.21* | -0.49, 2.21* | -0.45, 2.12*  | -0.50, 2.27* | -0.72, 2.88* | -0.34, 1.89  | -0.49, 2.31  | -           |
| BR-Sa1 | -                       | -            | -            | -            | -             | -            | -            | -0.12, 1.84  | -0.03, 1.65  | 0.00, 1.73  |
| BR-Sa3 | -                       | -            | -            | -            | -             | -            | -0.74, 2.61  | -0.73, 3.06* | 0.56, 1.01   | -0.23, 2.14 |
| CA-Gro | -0.52, 2.16*            | -0.66, 2.35* | -1.13, 3.51* | -0.57, 2.27* | -0.62, 2.36*  | -0.51, 2.17* | -0.57, 2.23* | -0.72, 2.61* | -0.22, 1.39  | -           |
| CA-NS1 | -0.38, 1.84*            | -0.34, 1.66* | -0.54, 2.14* | -0.59, 2.25* | -0.40, 1.87*  | -0.42, 1.82* | -0.30, 1.60* | -0.33, 1.64* | -0.32, 1.62  | -           |
| CA-NS2 | -0.44, 1.92*            | -0.35, 1.65* | -0.23, 1.37* | -0.24, 1.36* | -0.37, 1.62*  | -0.48, 1.96* | -0.32, 1.56  | -0.35, 1.58* | 0.33, -0.31  | -           |
| CA-NS3 | -0.22, 1.25*            | -0.04, 0.88  | -0.23, 1.23  | -0.06, 0.88  | 0.34, -0.16   | -0.15, 1.11  | -0.59, 2.33* | -0.77, 2.84* | 3.32, -8.17  | -           |
| CA-NS4 | -0.36, 1.30*            | -0.22, 1.08  | -0.42, 1.38* | -0.66, 2.06* | -0.12, 0.84   | -0.17, 0.98  | 0.37, -0.23  | -0.68, 2.36* | -0.97, 3.17  | -           |
| CA-NS5 | -0.61, 2.25*            | -0.64, 2.38* | -0.36, 1.84* | -0.45, 1.97* | -0.40, 1.94*  | -0.68, 2.67* | -0.39, 1.85  | -0.17, 1.31  | -1.96, 6.43  | -           |
| CA-NS6 | -0.37, 1.30*            | -0.42, 1.43* | -0.64, 1.89* | -0.36, 1.34* | -0.19, 1.04   | -0.15, 1.01  | -0.25, 1.27  | -0.17, 1.00  | -0.64, 2.28* | -           |
| CA-NS7 | -0.89, 2.78*            | -0.38, 1.63* | -0.65, 2.31* | -0.97, 3.11* | -0.80, 2.62*  | -1.05, 3.40* | -0.66, 2.55* | -0.58, 2.29  | -0.35, 1.72  | -           |

|        |              |              |              |              |              |              |              |              |              |              |
|--------|--------------|--------------|--------------|--------------|--------------|--------------|--------------|--------------|--------------|--------------|
| CA-Qfo | -0.30, 1.38* | -0.41, 1.55* | -0.38, 1.46* | -0.27, 1.25* | -0.28, 1.30* | -0.31, 1.30* | -0.29, 1.26* | -0.26, 1.17  | -0.21, 1.10  | -            |
| CA-SF1 | -0.35, 1.59* | -0.31, 1.56* | -0.31, 1.67* | -0.20, 1.48  | -0.09, 1.15  | -0.59, 2.34* | 1.60, -2.93* | -9.67, 26.97 | -            | -            |
| CA-SF2 | -1.02, 3.26* | -0.44, 2.11* | -0.41, 2.08* | -0.47, 2.28* | -0.58, 2.55* | -0.22, 1.75  | 0.50, -0.18  | -0.49, 2.35  | -0.93, 3.64* | -            |
| CA-SF3 | -0.49, 1.53* | -0.19, 0.94* | -0.44, 1.54* | -0.51, 1.70* | -0.18, 0.97* | -0.28, 1.21* | -0.25, 1.17  | -0.67, 2.39  | -0.16, 0.98  | -            |
| CA-TP1 | -0.01, 0.56  | -0.20, 0.94* | -0.07, 0.63  | -0.26, 1.05* | -0.16, 0.80* | -0.11, 0.79* | -0.19, 0.96* | -0.18, 0.92* | -0.08, 0.72  | -            |
| CA-TP2 | -1.07, 3.06* | -0.41, 2.49  | -0.52, 2.75* | -0.69, 3.16* | -0.27, 2.17  | -0.48, 2.55* | -1.36, 4.11* | -0.97, 3.77* | -0.12, 1.65  | -            |
| CA-TP3 | -0.23, 1.51  | -0.60, 2.11* | -0.35, 1.64* | -0.44, 1.77* | -0.61, 2.14* | -0.55, 2.05* | -0.50, 2.03* | -0.41, 1.77* | -0.46, 1.94* | -0.36, 1.71* |
| CH-Cha | -0.78, 2.64* | -0.64, 2.53* | -1.07, 3.24* | -0.93, 3.11* | -0.23, 1.82  | -0.65, 2.70* | -0.34, 1.92* | -0.79, 3.00* | 0.24, 0.52   | -            |
| CH-Fru | -0.12, 1.40* | 0.02, 1.22   | -0.03, 1.18  | -0.12, 1.43  | -0.07, 1.30  | -0.07, 1.11  | 0.35, 0.32   | -0.03, 1.13  | 0.11, 0.59   | -            |
| CH-Oe1 | -0.33, 1.75* | -0.40, 1.82* | -0.33, 1.78* | -0.64, 2.36* | -0.30, 1.65* | -0.45, 1.88* | -0.51, 2.00* | -0.64, 2.32* | -0.91, 3.14  | -            |
| CN-Cha | -0.80, 2.89* | -0.31, 2.32* | -0.49, 2.65* | -0.62, 2.86* | -0.50, 2.63* | -0.51, 2.68* | -0.36, 2.25* | -0.87, 3.36* | -0.53, 2.63  | -            |
| CN-Cng | -1.22, 4.00* | -1.01, 3.44  | -0.18, 1.71  | -1.37, 3.95* | -1.70, 4.95* | -0.97, 3.50* | -1.30, 4.32* | -1.51, 4.88* | -1.27, 4.34* | -            |
| CN-Din | -            | -            | -            | -            | -            | -            | -            | -0.40, 2.29* | -0.78, 2.35  | -            |
| CN-Du2 | -0.77, 2.15* | -0.36, 1.32  | -0.36, 1.30  | -0.70, 2.11* | -0.38, 1.22  | -0.69, 2.25* | -0.63, 1.93* | -0.04, 0.26  | -0.92, 3.07* | -            |
| CN-Ha2 | -            | -            | -            | -            | -0.62, 1.93* | -            | -            | -            | -            | -            |
| CN-HaM | -0.66, 1.86* | -            | -            | -            | -            | -            | -            | -            | -            | -            |
| CN-Qia | -            | -            | -            | -            | -3.49, 7.43* | 0.46, 1.37   | 18.00, 0.19  | -2.42, 5.66* | -1.00, 3.93* | -            |
| CZ-BK1 | -0.37, 2.55* | -0.66, 3.08* | -0.25, 2.45* | -1.07, 3.83* | -1.17, 4.17* | -0.55, 2.82  | -0.46, 2.67  | -1.41, 4.58* | -1.10, 4.13* | -            |
| CZ-BK2 | -0.37, 2.02* | -0.49, 2.35* | -0.40, 2.07* | -0.47, 2.32* | -0.45, 2.27  | -0.21, 1.96  | -0.61, 2.71  | 0.61, -0.16  | 0.43, 0.02   | -            |
| DE-Gri | -1.23, 3.87* | -0.96, 3.37* | -1.13, 3.96* | -1.18, 3.98* | -1.22, 4.23* | -0.60, 2.78  | -1.75, 5.49* | -2.00, 6.49* | -2.96, 9.17* | -            |
| DE-Hai | -0.59, 2.86* | -0.63, 2.84* | -0.63, 2.85* | -0.81, 3.22* | -0.93, 3.54* | -0.72, 3.03* | -0.61, 2.82* | -1.41, 5.05* | -1.74, 5.94* | -            |
| DE-Kli | -0.28, 1.76* | -0.57, 2.21* | 0.05, 1.10   | -0.63, 2.39  | -0.68, 2.58  | -0.85, 2.76* | -1.39, 4.26* | -0.90, 3.22  | -0.72, 2.76  | -            |

|        |              |              |              |              |              |              |              |              |              |              |
|--------|--------------|--------------|--------------|--------------|--------------|--------------|--------------|--------------|--------------|--------------|
| DE-Lkb | 0.32, -0.07* | -0.06, 0.50  | 0.12, 0.14   | 0.08, 0.23   | -4.88, 11.91 | 0.12, 0.08   | 0.03, 0.29   | -            | -            | -            |
| DE-Obe | -0.57, 2.53* | -0.37, 2.23* | -0.64, 2.70* | -0.42, 2.32* | -0.49, 2.46  | -0.18, 1.95  | -0.46, 2.36  | -0.16, 1.70  | 9.44, -23.81 | -            |
| DE-Spw | -0.59, 3.30* | -0.83, 3.55* | -0.95, 3.83* | -1.36, 4.53* | -1.35, 4.55* | -0.82, 3.53* | -0.81, 3.43* | -0.55, 2.88  | -0.62, 2.99  | -            |
| DE-Tha | -0.73, 3.21* | -0.93, 3.56* | -0.83, 3.27* | -0.70, 3.12* | -1.10, 3.99* | -0.89, 3.57* | -0.83, 3.38* | -0.65, 2.97* | -0.82, 3.38* | -0.71, 3.54* |
| ES-LgS | -0.40, 1.33* | -0.02, 0.45  | -0.15, 0.73* | -0.46, 1.58* | 0.08, 0.14   | 0.17, -0.15  | -            | -            | -            | -            |
| FI-Gri | -            | -            | -            | -            | -0.36, 2.01* | -0.25, 1.23* | -            | -            | -            | -            |
| FI-Hyy | -0.45, 2.00* | -0.47, 2.03* | -0.41, 1.96* | -0.30, 1.71* | -0.52, 2.21* | -0.38, 1.92* | -0.51, 2.20* | -0.64, 2.50* | -0.18, 1.45  | -            |
| FR-Fon | -1.33, 4.51* | -0.97, 4.13* | -1.14, 4.65* | -1.12, 4.41* | -1.16, 4.61* | -0.78, 3.91* | -1.09, 4.38* | -1.38, 5.10* | -0.98, 4.17* | -            |
| FR-Pue | -0.22, 1.37  | -0.20, 1.21* | -0.16, 1.07* | -0.34, 1.42* | -0.34, 1.49* | -0.38, 1.52* | -0.35, 1.42* | -0.27, 1.16* | -0.24, 1.09* | -0.31, 1.29* |
| IT-La2 | -0.88, 2.65* | -0.82, 2.70* | 0.44, 0.09   | -0.06, 0.90  | 0.50, -0.23  | -            | -            | -            | -            | -            |
| IT-Lav | -0.30, 1.57* | -0.39, 1.69* | -0.30, 1.52* | -0.34, 1.59* | -0.30, 1.45* | -0.54, 2.01* | -0.45, 1.79  | -0.56, 2.11* | -            | -            |
| IT-PT1 | -            | -0.74, 2.66* | -1.28, 3.21  | -0.80, 3.26  | -0.28, 2.50  | -0.29, 2.50  | -0.47, 2.64* | -0.33, 2.48* | -0.60, 3.07* | -            |
| IT-Ren | -0.01, 1.53  | -0.24, 1.65  | -0.17, 1.45  | -0.62, 2.33* | -0.52, 2.11  | -            | -            | -            | -            | -            |
| IT-Ro1 | -1.22, 4.25  | -1.07, 3.93  | -0.35, 2.34  | -0.39, 2.76  | -0.63, 2.87* | -0.17, 1.90  | -0.48, 2.27* | -0.76, 3.09* | -0.54, 2.54* | -0.48, 2.34* |
| IT-Ro2 | -0.84, 3.24  | -0.20, 2.51  | -0.16, 2.27  | -0.32, 2.51  | -0.81, 3.44* | 0.03, 1.51   | -0.17, 1.92  | -0.46, 2.58* | -0.61, 2.91* | -0.30, 2.21* |
| IT-Tor | 0.10, 0.91   | -0.83, 3.12  | -            | -            | -            | -            | -            | -            | -            | -            |
| JP-MBF | -0.60, 2.03* | -1.64, 3.60* | -0.46, 1.72* | -0.52, 1.84  | -0.80, 2.56* | -0.56, 2.13* | -0.27, 1.57  | -            | -            | -            |
| MY-PSO | -            | -            | -            | -            | -            | -            | -            | -            | -0.15, 1.29  | -            |
| NL-Hor | -0.43, 1.85* | -0.57, 2.33* | -0.52, 2.15* | -0.30, 1.87* | -0.30, 1.83* | -0.05, 1.35  | -0.01, 1.26  | -0.14, 1.49  | -0.50, 2.13  | -            |
| NL-Loo | -0.28, 1.85* | -0.32, 1.92* | -0.48, 2.15* | -0.37, 1.95* | -0.42, 2.06* | -0.52, 2.28* | -0.47, 2.12* | -0.46, 2.16* | -0.56, 2.42* | -            |
| RU-Fyo | -0.48, 2.26* | -0.47, 2.22* | -0.55, 2.29* | -0.46, 2.13* | -0.60, 2.33* | -0.50, 2.12* | -0.45, 2.03* | -0.46, 2.05* | -0.51, 2.21  | -0.65, 2.44  |
| RU-Ha1 | -0.31, 1.20* | -0.26, 1.09* | -0.28, 1.20* | -0.72, 2.07* | -0.09, 0.75  | -0.04, 0.65  | -0.05, 0.61  | 0.17, 0.03   | 0.44, -0.64  | -            |

|        |              |              |              |              |              |              |              |              |               |              |
|--------|--------------|--------------|--------------|--------------|--------------|--------------|--------------|--------------|---------------|--------------|
| US-AR1 | -            | -            | -            | -1.02, 3.72  | -0.18, 1.09  | -0.57, 2.09  | 0.13, 0.22   | -0.48, 1.59  | -0.10, 0.93   | -            |
| US-AR2 | -            | -            | -            | -0.10, 0.94  | -0.14, 0.85  | -0.08, 0.62  | -4.85, 10.93 | -0.46, 1.43  | -0.70, 2.41*  | -            |
| US-ARM | -            | -            | 0.02, 0.57   | 0.13, -0.14  | -1.51, 3.41* | -0.16, 1.07  | -0.18, 0.88  | -0.12, 0.93  | -0.06, 0.79   | -            |
| US-Blo | -0.12, 0.92  | -0.20, 1.02* | -0.27, 1.27* | -0.01, 0.58  | -0.20, 1.13* | -0.14, 0.93  | -0.26, 1.29* | -0.25, 1.21  | -0.58, 2.27*  | -0.83, 2.99* |
| US-Goo | -            | -0.40, 1.43* | 1.55, -1.85  | -1.69, 4.04  | -0.10, 1.27  | -0.05, 0.93  | -0.30, 1.38  | -0.49, 1.82* | -0.23, 1.37*  | -            |
| US-Ha1 | -0.46, 1.86* | -0.37, 1.87* | -0.37, 1.84* | -0.32, 1.82* | -0.35, 1.92* | -0.26, 1.81* | -0.29, 1.87* | -0.29, 1.87* | -0.18, 1.56*  | -            |
| US-Ivo | 0.15, 0.87   | -0.60, 1.75  | 0.02, 0.38   | -4.37, 10.98 | -            | -            | -            | -            | -             | -            |
| US-KS2 | -            | -            | -            | -            | -            | -            | -            | -            | -0.33, 1.38   | -            |
| US-Los | 0.05, 0.90   | -0.11, 1.16* | -0.05, 1.04  | -0.10, 1.09* | 0.09, 0.75   | -0.03, 1.02  | 0.03, 0.88   | -0.26, 1.55* | -0.24, 1.47*  | -            |
| US-Me2 | -0.39, 1.61* | -0.34, 1.47* | -0.28, 1.36* | -0.48, 1.94* | -0.30, 1.45* | -0.60, 2.30* | -0.92, 3.34* | -0.46, 2.01* | -1.06, 3.86*  | -            |
| US-Me6 | 0.16, 0.12*  | -0.37, 1.31* | -0.67, 2.13* | -0.30, 1.22  | -0.43, 1.55* | -0.22, 1.03  | -0.02, 0.45  | -1.40, 4.69* | -             | -            |
| US-MMS | -0.58, 2.62* | -0.51, 2.73  | -1.11, 3.79* | -0.37, 2.41* | -0.33, 2.18* | -0.92, 3.30* | -0.39, 2.35* | -0.54, 2.61* | -0.47, 2.49*  | -0.50, 2.58* |
| US-Ne1 | -0.59, 2.47* | -1.12, 3.18* | 0.08, 1.40   | -1.15, 3.78* | -0.82, 3.47* | -0.88, 3.54* | -0.81, 3.60* | -0.75, 3.81* | -0.75, 3.93*  | -0.82, 3.94* |
| US-Ne2 | -0.43, 1.92  | -0.42, 1.85  | -1.38, 3.60* | -0.92, 3.20* | -0.89, 3.02* | -0.57, 2.46* | -0.37, 2.41* | -0.83, 3.47* | -0.68, 3.19*  | -0.97, 3.66* |
| US-Ne3 | -1.19, 2.82* | -0.96, 2.30* | -0.78, 2.47* | -0.83, 2.69* | -0.48, 2.13  | -0.58, 2.47* | -0.76, 2.93* | -0.73, 3.11* | -0.56, 2.78*  | -            |
| US-NR1 | -0.63, 2.27* | -0.61, 2.25* | -1.02, 3.35* | -0.52, 2.05  | -            | -            | -            | -            | -             | -            |
| US-Oho | -0.70, 3.12* | -0.70, 3.02* | -0.49, 2.71* | -0.54, 2.71* | -0.61, 2.95* | -0.62, 3.00* | -0.49, 2.67* | -0.54, 2.83* | -0.57, 2.96*  | -            |
| US-PFa | -0.12, 1.55* | -0.23, 1.37* | -0.30, 1.52* | -0.41, 1.73* | -0.30, 1.57* | -0.31, 1.56* | -0.38, 1.72* | -0.36, 1.66* | -0.53, 2.05*  | -            |
| US-Sta | -0.33, 1.66  | 0.05, 0.03   | -0.01, 0.20  | -0.10, 0.39  | -0.01, 0.16  | -0.10, 0.38  | -0.11, 0.43  | -0.26, 0.87* | -0.34, 1.12   | -            |
| US-Syv | -0.44, 1.73* | -0.42, 1.76* | -0.31, 1.56* | -0.38, 1.88* | -0.25, 1.64* | -0.41, 1.91* | 0.03, 1.05   | -0.17, 1.54  | 0.01, 1.23    | -            |
| US-Ton | 0.49, -0.12  | -0.24, 1.10  | -0.31, 1.26  | 0.09, 0.28   | -0.14, 0.77  | 0.15, 0.02   | -0.10, 0.62  | -0.17, 0.83  | -0.11, 0.66   | -0.09, 0.61  |
| US-Twt | -0.55, 1.71  | -4.15, 8.70* | -1.92, 5.32  | -3.83, 9.59* | -2.26, 7.03* | -1.99, 6.82* | -0.66, 3.68  | -1.40, 5.38  | -4.23, 13.59* | -2.87, 9.76  |

|        |              |              |              |              |              |              |              |              |              |             |
|--------|--------------|--------------|--------------|--------------|--------------|--------------|--------------|--------------|--------------|-------------|
| US-UMB | -0.63, 2.55* | -0.69, 2.67* | -0.75, 2.85* | -0.64, 2.66* | -0.58, 2.53* | -0.40, 2.23* | -0.49, 2.44* | -0.71, 2.99* | -0.49, 2.48* | -           |
| US-Var | 0.17, 0.85   | -0.59, 1.39  | -0.38, 0.97* | -0.38, 1.02  | -0.62, 1.70* | -0.60, 1.69* | -0.21, 0.69  | -0.65, 2.01* | -1.05, 3.25* | -           |
| US-WCr | -0.40, 1.44* | -0.40, 1.72* | -0.26, 1.48* | -0.39, 1.70* | -0.23, 1.42  | -0.49, 1.89* | -0.34, 1.62* | -0.37, 1.68  | -0.51, 2.03* | -           |
| ZM-Mon | -            | -            | -            | -            | -0.55, 1.98* | -0.55, 2.01  | -0.69, 2.04  | -0.99, 2.67* | -1.02, 2.84  | -1.92, 5.34 |

<sup>1</sup>air temperature ranges from 15°C-25°C. <sup>2</sup>correlation coefficients (a, b) of logarithm equations ( $LUE=a \times \ln(VPD)+b$ ), and \* indicates the significance level at  $p<0.05$ . “-” indicates failure regression due to no adequate measurements.

**Table S5. CMIP5 models used to estimate VPD from 1850 to 2100.**

| <b>Modeling Center/Group</b>                                                                                                                                              | <b>Institute ID</b> | <b>IPCC Model Name</b> |
|---------------------------------------------------------------------------------------------------------------------------------------------------------------------------|---------------------|------------------------|
| Canadian Centre for Climate Modelling and Analysis                                                                                                                        | CCCMA               | CanESM2                |
| National Center for Atmospheric Research                                                                                                                                  | NCAR                | CESM1                  |
| NASA Goddard Institute for Space Studies                                                                                                                                  | NASA GISS           | GISS-E2-R              |
| Met Office Hadley Centre                                                                                                                                                  | MOHC                | HadGEM2                |
| Institute for Numerical Mathematics                                                                                                                                       | INM                 | INM-CM4                |
| Atmosphere and Ocean Research Institute (The University of Tokyo), National Institute for Environmental Studies, and Japan Agency for Marine-Earth Science and Technology | MIROC               | MIROC5                 |



**Table S6. Correlation matrixes for global VPD simulated by the six CMIP5 ESMs and four historical datasets (CRU, ERA-Interim, HadISDH, and MERRA).**

|             | CRU | ERA-Interim | HadISDH | MERRA | CanESM2 | CESM1 | GISS E2-R | HadGEM2 | INM-CM4 | MIROC5 |
|-------------|-----|-------------|---------|-------|---------|-------|-----------|---------|---------|--------|
| CRU         | -   | 0.93        | 0.80    | 0.70  | 0.49    | 0.52  | 0.44      | 0.32    | 0.25    | 0.25   |
| ERA-Interim |     | -           | 0.89    | 0.76  | 0.38    | 0.47  | 0.47      | 0.40    | 0.07n   | 0.63   |
| HadISDH     |     |             | -       | 0.77  | 0.38    | 0.46  | 0.37      | 0.34    | 0.09n   | 0.59   |
| MERRA       |     |             |         | -     | 0.30    | 0.46  | 0.38      | 0.28    | 0.07n   | 0.48   |
| CanESM2     |     |             |         |       | -       | 0.89  | 0.87      | 0.84    | 0.74    | 0.79   |
| CESM1       |     |             |         |       |         | -     | 0.88      | 0.84    | 0.75    | 0.78   |
| GISS E2-R   |     |             |         |       |         |       | -         | 0.81    | 0.74    | 0.77   |
| HadGEM2     |     |             |         |       |         |       |           | -       | 0.69    | 0.74   |
| INM-CM4     |     |             |         |       |         |       |           |         | -       | 0.65   |
| MIROC5      |     |             |         |       |         |       |           |         |         | -      |

The correlation matrixes display correlation coefficient ( $R^2$ ) of global averaged vapor pressure deficit, and “n” indicate the insignificant correlation.

**Table S7. Model parameters of EC-LUE for different vegetation types.**

| Vegetation Type                              | DBF  | ENF   | EBF  | MF   | GRA  | CRO  | WET  | SAV  | SHR  |
|----------------------------------------------|------|-------|------|------|------|------|------|------|------|
| $\varepsilon_{\max}$ (g C MJ <sup>-1</sup> ) | 2.02 | 3.16  | 3.92 | 3.46 | 3.32 | 2.85 | 2.65 | 1.54 | 0.75 |
| $\theta$ (ppm)                               | 60   | 20.69 | 30   | 52   | 75   | 64   | 68   | 41   | 37   |
| VPD <sub>0</sub> (kPa)                       | 0.54 | 0.69  | 0.29 | 0.41 | 1.21 | 0.89 | 1.16 | 1.04 | 1.13 |

DBF: deciduous broadleaf forest; ENF: evergreen needleleaf forest; EBF: evergreen broadleaf forest; MF: mixed forest; GRA: grassland; CRO: cropland; WET: wetland; SAV: savanna; SHR: shrubland.
